# Supplementary material for: Sex Biases in Cancer and Autoimmune Disease Incidence Are Strongly Positively Correlated with Mitochondrial Gene Expression across Human Tissues
Source: Cancers (Basel). 2022 Nov 29;14(23):5885. doi: 10.3390/cancers14235885 (PMC9736300; doi:10.3390/cancers14235885)
Supplement: Supplementary file 1 [file cancers-14-05885-s001.zip]

Archive with 10 entries (10 files):
- cancers-1948266 Supplementary Figures S1-S5.pdf
- cancers-1948266 Supplementary refs.pdf
- cancers-1948266 Table S1_AID_study_data.xlsx
- cancers-1948266 Table S2_AIDs_Cancers_GTEx_samples.xlsx
- cancers-1948266 Table S3_Matched_AID_cancer_data.xlsx
- cancers-1948266 Table S4_Cancer_AID_incidence_rate_averages.xlsx
- cancers-1948266 Table S5_Expanded_cancer_groups.xlsx
- cancers-1948266 Table S6_Human_mitochondrial_genes.xlsx
- cancers-1948266 Table S7_Cancer_rodent_models.xlsx
- cancers-1948266 Table S8_AID_rodent_models.xlsx
