# Supplementary material for: Sex Biases in Cancer and Autoimmune Disease Incidence Are Strongly Positively Correlated with Mitochondrial Gene Expression across Human Tissues
Source: Cancers (Basel). 2022 Nov 29;14(23):5885. doi: 10.3390/cancers14235885 (PMC9736300; doi:10.3390/cancers14235885)
Supplement: Supplementary file 1 [file cancers-14-05885-s001.zip › cancers-1948266 Table S1_AID_study_data.xlsx]

## Sheet: Sheet1
Matched_site	Autoimmune_condition	F_no	F_IR	M_no	M_IR	IR_sex_source	IR_sex_value_type	Overall_IR	IR_overall_source	IR_overall_value_type	Sex_ratio_given_FM	Pop_sex_ratio_given_FM	Relative_risk_F_to_M	IRR_value_source	IRR_value_type	Total_cases	Population	Year_start	Year_end	Study	Article link (DOI or other)	Notes
adrenal_glands	Addison's disease	1525	1.3	1057	1	given	AIR	1.15					1.4	given	IR ratio	2582	Sweden	1987	2010	Ji et al. 2016	https://doi.org/10.1016/j.jaut.2016.03.003
adrenal_glands	Addison's disease	818		682												1500	Sweden	1964	2013	Skov et al. 2019	https://doi.org/10.1210/jc.2018-02298	Study provides population-based case counts only.
adrenal_glands	Addison's disease	828		536												1364	Germany	2008	2012	Meyer et al. 2014	https://doi.org/10.1530/EJE-13-0756
adrenal_glands	Addison's disease	25		11												36	Japan	1987	1991	Nomura et al. 1994	https://doi.org/10.2169/internalmedicine.33.602
biliary	Primary biliary cholangitis	2815	2.4	655	0.6	given	AIR						4.1	given	IR ratio	3470	Sweden	1987	2010	Ji et al. 2016	https://doi.org/10.1016/j.jaut.2016.03.003
biliary	Primary biliary cholangitis	20	0.776667	6	0.236667	calculated	avg IR	0.506667	calculated	avg IR						26	New_Zealand	2008	2016	Lamba et al. 2021	https://doi.org/10.1016/j.cgh.2020.05.061
biliary	Primary biliary cholangitis	131	2.5	7	0.1325	calculated	avg AIR	1.5	calculated	avg AIR						138	Israel	1990	2010	Delgado et al. 2012	https://doi.org/10.1016/j.ejim.2012.09.004
biliary	Primary biliary cholangitis	871	1.9	121	0.3	given	SIR	1.1	given	SIR						992	Netherlands	2000	2008	Boonstra et al. 2014	https://doi.org/10.1111/liv.12434
biliary	Primary biliary cholangitis	41	4.5	5	0.7	given	AIR	2.7	given	AIR						46	USA	1975	1995	Kim et al. 2000	https://doi.org/10.1053/gast.2000.20197
biliary	Primary biliary cholangitis	872	1.42	175	0.287	given	AIR	0.857	given	AIR						1047	Korea	2011	2013	Kim et al. 2016	https://doi.org/10.1111/apt.13448
biliary	Primary biliary cholangitis	704	1.28	188	0.38	given	AIR	0.84	given	AIR						892	Hong_Kong	2000	2015	Cheung et al. 2017	https://doi.org/10.1038/ctg.2017.43
biliary	Primary biliary cholangitis	138	3.75	30	0.8	calculated	avg AIR	2.25	calculated	avg AIR						168	Iceland	1991	2010	Baldursdottir et al. 2012	https://doi.org/10.1097/MEG.0b013e328353753d
biliary	Primary biliary cholangitis	887	8.34235	95	0.990882	calculated	avg AIR	4.90476	calculated	avg AIR						982	UK	1987	2003	McNally et al. 2014	https://doi.org/10.1093/aje/kwt308
biliary	Primary biliary cholangitis		1.77		0.47	given	AIR	1.14	given	AIR						722	Denmark	2000	2009	Lleo et al. 2016	https://doi.org/10.1038/srep25906
biliary	Primary biliary cholangitis		2.19		1.07	given	AIR	1.67	given	AIR						2970	Italy	2004	2009	Lleo et al. 2016	https://doi.org/10.1038/srep25906
biliary	Primary biliary cholangitis		4.16		1.04			2.6	given	IR			4	given	IR ratio		Sweden	1987	2014	Marschall et al. 2019	https://doi.org/10.1038/s41598-019-47890-2
biliary	Primary biliary cholangitis	66	0.434261	3	0.0197391			0.227	given	IR						69	Estonia	1973	1992	Remmel et al. 1995	https://doi.org/10.3109/00365529509093292
biliary	Primary biliary cholangitis	75		4				4.9	given	AIR						79	USA	1992	2011	Kanth et al. 2017	https://doi.org/10.3121/cmr.2017.1351
biliary	Primary biliary cholangitis		2.35		0.55	calculated	avg AIR	1.45	calculated	avg AIR							Finland	1988	1999	Rautiainen et al. 2007	https://doi.org/10.1080/00365520701396034	N estimated from IRxPOP
biliary	Primary biliary cholangitis	84		3				1.72	given	IR	28					87	Spain	1990	2002	Pla et al. 2007	https://doi.org/10.1097/MEG.0b013e328277594a
biliary	Primary biliary cholangitis	215		30				2.09	given	IR						245	Greece	1990	2010	Koulentaki et al. 2014	https://doi.org/10.1111/liv.12479
biliary	Primary biliary cholangitis	313		34				1.54818	calculated	avg IR	9.2					347	UK	1965	1987	Myszor & James 1990	https://doi.org/10.1093/oxfordjournals.qjmed.a068447
biliary	Primary biliary cholangitis	401		73												474	Switzerland	2005	2015	Beretta-Piccoli et al. 2018	https://doi.org/10.1007/s12016-017-8656-x
biliary	Primary biliary cholangitis		4.84		1.04	given	AIR	3.03	given	AIR						137	Canada	1996	2002	Myers et al. 2009	https://doi.org/10.1002/hep.23210
biliary	Primary biliary cholangitis	65		6												71	New_Zealand	1980	2006	Ngu et al. 2012	https://doi.org/10.1002/hep.24743
CNS	Multiple sclerosis	453	7.82217	327	5.51478	calculated	avg AIR	6.61565	calculated	avg AIR						780	Greece	1984	2006	Papathanasopoulos et al. 2008	https://doi.org/10.1159/000122334
CNS	Multiple sclerosis	12323	11.5	5519	5.1	given	AIR						2.3	given	IR ratio 2013	17751	Sweden	1987	2010	Ji et al. 2016	https://doi.org/10.1016/j.jaut.2016.03.003
CNS	Multiple sclerosis	444	7.2	198	3.1	given	AIR	5.1	given	AIR						642	UK	1993	2000	Alonso et al. 2007	https://doi.org/10.1007/s00415-007-0602-z
CNS	Multiple sclerosis	86	6.7	47	3.7	given	IR	5.2	given	IR						133	Sweden	1988	1997	Sundström et al. 2003	https://doi.org/10.1136/jnnp.74.1.29
CNS	Multiple sclerosis	37	11.5	19	6.6	given	IR	9.2	given	IR						56	Italy	1993	2002	Grimaldi et al. 2007	https://doi.org/10.1159/000097853
CNS	Multiple sclerosis		32.2		12.7	given	AIR	22.5333	calculated	avg AIR						2018	Canada	2000	2002	Warren et al. 2007	https://doi.org/10.1159/000097852
CNS	Multiple sclerosis	66	7.5	18	2.1	given	AIR	4.8	given	AIR						84	Netherlands	1996	2008	Kramer et al. 2012	https://doi.org/10.1159/000338678
CNS	Multiple sclerosis	62	11.8	19	3.9	given	IR	7.7	given	AIR						81	Germany	1998	2002	Fasbender & Kölmel 2008	https://doi.org/10.1159/000122331
CNS	Multiple sclerosis	350	3.26667	198	2.16667	calculated	avg AIR	2.73333	calculatd	avg AIR						548	Finland	1964	1978	Kinnunen 1984	https://doi.org/10.1212/wnl.34.4.457
CNS	Multiple sclerosis	113	7.93726	48	2.54708	calculated	avg AIR	6.7	given	AIR						161	Australia	2001	2011	Ribbons et al. 2017	https://doi.org/10.1177/1352458516671819
CNS	Multiple sclerosis	329	6.9	168	3.4875	calculated	avg AIR	5.5125	calculated	avg AIR						497	Norway	1970	2010	Benjaminsen et al. 2014	https://doi.org/10.1186/s12883-014-0226-8
CNS	Multiple sclerosis	12897	23.159	5208	10.617	calculated	avg AIR	17.288	calculated	avg AIR			2.188	calculated	avg IR ratio	18105	Germany	2006	2015	Daltrozzo et al. 2018	https://doi.org/10.3389/fneur.2018.00871
CNS	Multiple sclerosis	253	7.25	95	3.1	calculated	avg IR	5.2	calculated	avg AIR						348	USA	1905	1984	Wynn et al. 1990	https://doi.org/10.1212/WNL.40.5.780
CNS	Multiple sclerosis	190	5.68	77	2.21	given	AIR	4.12	given	AIR						267	Poland	2010	2014	Brola et al. 2016	https://doi.org/10.1186/s12883-016-0662-8
CNS	Multiple sclerosis	3124	11.5	1098	4.1	given	SIR	7.8	given	SIR						4222	Canada	1991	2010	Kingwell et al. 2015	https://doi.org/10.1007/s00415-015-7842-0
CNS	Multiple sclerosis	149	4.78	85	2.78167	calculated	avg AIR	3.52222	calculated	avg AIR							Kuwait	2003	2011	Alroughani et al. 2014	https://doi.org/10.1177/1352458513504328
CNS	Multiple sclerosis	496	6.5	193	2.6	given	IR	4.4	given	AIR						689	Italy	1965	1999	Pugliatti et al. 2005	https://doi.org/10.1159/000086677
CNS	Multiple sclerosis	673	1.104	256	0.444	calculated	avg AIR	0.786	calculatd	avg AIR			2.46305	calculated	avg IR ratio	929	Taiwan	2000	2005	Lai et al. 2009	https://doi.org/10.1159/000229779
CNS	Multiple sclerosis	916	7.395	318	2.52	calculated	avg IR	4.945	calculated	avg IR			2.984	calculated	avg IR ratio	1234	Iran	2013	2014	Eskandarieh et al. 2017	https://ijph.tums.ac.ir/index.php/ijph/article/view/9920	PMID: 28560202
CNS	Multiple sclerosis	5588	4.106	1913	1.3615	calculated	avg AIR	2.6955	calculated	avg AIR			3.04	given	IR ratio	7501	Iran	1989	2008	Elhami et al. 2011	https://doi.org/10.1159/000324708
CNS	Multiple sclerosis	170	3	82	1.5	given	IR	2.3	given	IR						252	Italy	1965	1993	Granieri et al. 1996	https://doi.org/10.1001/archneur.1996.00550080115019
CNS	Multiple sclerosis	514		190				14.2	given	IR						704	USA	1998	2004	Klein et al. 2010	https://doi.org/10.1016/j.vaccine.2009.10.115
CNS	Multiple sclerosis	721		324				5.4	given	IR (for adults)						1045	Israel	1995	2009	Achiron et al. 2012	https://pubmed.ncbi.nlm.nih.gov/22675841/	PMID: 22675841
CNS	Multiple sclerosis		4.85		3.98	given	IR	4.41	given	AIR						6404	Denmark	1948	1964	Koch-Henriksen et al. 1988	https://doi.org/10.1111/j.1600-0404.1988.tb03672.x
CNS	Multiple sclerosis	213	8.7	79	3.3	given	AIR	6	given	AIR						292	Ireland	2014	2015	O'Connell et al. 2017	https://doi.org/10.1016/j.msard.2017.02.010
CNS	Multiple sclerosis	19417		7657												27074	Canada	1931	1980	Orton et al. 2006	https://doi.org/10.1016/S1474-4422(06)70581-6
CNS	Multiple sclerosis	256	8.6	118	3.9			6.3	given	IR						374	Finland	1992	2007	Krökki et al. 2011	https://doi.org/10.1177/1352458510384012
CNS	Multiple sclerosis												2.23444	calculated	avg IR ratio	16000	Canada	1996	2013	Rotstein et al. 2018	https://doi.org/10.1212/WNL.0000000000005331	estimated case count
CNS	Multiple sclerosis							19.5	given	corrected IR			1.6	given		1638	Austria	2010	2013	Salhofer-Polanyi et al. 2017	https://doi.org/10.1159/000479696
CNS	Multiple sclerosis	49	4.79	13	1.3	given	AIR	3.09	given	AIR						62	Portugal	1998	2007	de Sá et al. 2014	https://doi.org/10.1186/s12883-014-0249-1
colon	Ulcerative colitis	24428	22.8	27309	25.8	given	AIR						0.9	given	IR ratio	51737	Sweden	1987	2010	Ji et al. 2016	https://doi.org/10.1016/j.jaut.2016.03.003
colon	Ulcerative colitis	619	8.5	542	7.7	given	IR	8.1	given	IR						1161	Denmark	1962	1987	Langholz et al. 1991	https://doi.org/10.3109/00365529108998621
colon	Ulcerative colitis	49	0.71	45	0.66	given	AIR	0.68	given	AIR						94	Korea	1986	1997	Yang et al. 2001	https://doi.org/10.1046/j.1440-1746.2000.02252.x
colon	Ulcerative colitis	161	6.5	211	9.8	given	AIR	8.1	given	AIR						372	USA	1940	2000	Loftus et al. 2007	https://doi.org/10.1002/ibd.20029
colon	Ulcerative colitis	1170	3.375	1495	4.65	calculated	avg IR	3.975	calculated	avg AIR						2665	France	1988	1990	Molinié et al. 2004	https://doi.org/10.1136/gut.2003.025346
colon	Ulcerative colitis	238	12.1	287	14.8	given	IR	13.6	given	AIR						525	Norway	1990	1993	Moum et al. 1996	https://doi.org/10.3109/00365529609006411	Counts derived from Table II p.363
colon	Ulcerative colitis	211	8.9	272	12.3	given	AIR	10.6	given	AIR						483	USA	1970	2010	Shivashankar et al. 2017	https://doi.org/10.1016/j.cgh.2016.10.039
colon	Ulcerative colitis		22.1		24.4	given	AIR	23.2	given	AIR						12787	UK	2000	2018	King et al. 2020	https://doi.org/10.1111/apt.15701
colon	Ulcerative colitis	10	0.54	19	0.9175	calculated	avg IR over periods	0.74	given	IR						29	Turkey	1998	2002	Tezel et al. 2003	https://doi.org/10.1177/147323000303100211
colon	Ulcerative colitis	235	14.1	251	16.1	given	AIR	15.1	given	AIR						486	USA	2008	2010	Shapiro et al. 2016	https://doi.org/10.1097/MIB.0000000000000745
colon	Ulcerative colitis	593		681								1.08				1274	Sweden	1955	1979	Nordenvall et al. 1985	https://doi.org/10.3109/00365528509088823
colon	Ulcerative colitis							3.16	given	IR	0.793651					111	Spain	1981	1988	Maté-Jimenez et al. 1994	https://doi.org/10.1097/00004836-199401000-00008
colon	Ulcerative colitis	8902	20.025	8598	19.975	calculated	avg AIR over periods									17500	Denmark	1995	2011	Nørgård et al. 2014	https://doi.org/10.1016/j.crohns.2014.03.006
colon	Ulcerative colitis							3.039	calculated	avg AIR over periods	0.98					528	USA	1973	1986	Stowe et al. 1990	https://doi.org/10.1016/0016-5085(90)91297-J
colon	Ulcerative colitis	51		54				3.9	given	AIR						105	Germany	2004	2007	Ott et al. 2008	https://doi.org/10.1097/MEG.0b013e3282f97b33
colon	Ulcerative colitis							3.00588	calculated	avg IR	1.02041					317	Finland	1987	2003	Turunen et al. 2006	https://doi.org/10.1097/00054725-200608000-00002	pediatric
colon	Ulcerative colitis	109		148				10	given	AIR						257	Netherlands	1991	1994	Russel et al. 1998	https://doi.org/10.1007/BF02236893
colon	Ulcerative colitis	235		291				20	given	AIR	0.81					526	Sweden	2005	2009	Sjöberg et al. 2013	https://doi.org/10.1016/j.crohns.2013.02.006
colon	Ulcerative colitis										0.875					385	Sweden	1945	2007	Rönnblom et al. 2010	https://doi.org/10.1016/j.crohns.2010.03.003
colon	Ulcerative colitis	759	12.65	756	12.2	calculated	average IR				1					1515	Denmark	1978	2002	Jacobsen et al. 2006	https://doi.org/10.1097/00042737-200606000-00005
colon	Ulcerative colitis							14.8	given	IR	0.91					239	Norway	1984	1985	Haug et al. 1988	https://doi.org/10.3109/00365528809093904
kidney	anti-GBM	35		44				0.164	given	crude IR						79	Ireland	2003	2014	Canney et al. 2016	https://doi.org/10.2215/CJN.13591215
kidney	anti-GBM	47		45												92	Netherlands	1978	2003	van Paassen et al. 2004	https://doi.org/10.1111/j.1523-1755.2004.00835.x
kidney	anti-GBM	95		101												196	USA	1986	2015	O'Shaughnessy et al. 2017	https://doi.org/10.2215/CJN.10871016
kidney	Autoimmune MN	27		46												73	Sweden	2000	2012	Lönnbro-Widgren et al. 2016	https://doi.org/10.1093/ckj/sfv152
kidney	Autoimmune MN	42		89												131	Netherlands	1978	2003	van Paassen et al. 2004	https://doi.org/10.1111/j.1523-1755.2004.00835.x
kidney	Autoimmune MN	1165		1580												2745	USA	1986	2015	O'Shaughnessy et al. 2017	https://doi.org/10.2215/CJN.10871016
kidney	Autoimmune MN							0.75	given	IR	0.526316					267	UK	1976	2005	Hanko et al. 2009	https://doi.org/10.1093/ndt/gfp254
kidney	Autoimmune MN							0.48	given	IR	0.639344					276	Denmark	1985	1997	Heaf et al. 1999	https:/doi.org/10.1093/ndt/14.8.1889
kidney	Autoimmune MN	87		204												291	Korea	1973	1995	Choi et al. 2001	https://doi.org/10.3349/ymj.2001.42.2.247
liver	Autoimmune hepatitis	67	2.59333	32	1.24333	calculated	avg IR	1.93	given	IR						99	New_Zealand	2008	2016	Lamba et al. 2021	https://doi.org/10.1016/j.cgh.2020.05.061
liver	Autoimmune hepatitis	662	3.05	220	1.07	given	AIR	2.08	given	AIR						882	UK	1997	2015	Grønbæk et al. 2020	https://doi.org/10.1111/liv.14480
liver	Autoimmune hepatitis	1195	1.1	447	0.4	given	AIR						2.5	given	IR ratio	1642	Sweden	1987	2010	Ji et al. 2016	https://doi.org/10.1016/jaut.2016.03.003
liver	Autoimmune hepatitis	39	3.66	9	0.88	given	AIR	2.23	given	AIR						48	Japan	2004	2014	Yoshizawa et al. 2016	https://doi.org/10.1111/hepr.12639
liver	Autoimmune hepatitis	1438	1.83	249	0.31	given	AIR	1.07	given	AIR						1687	Korea	2009	2013	Kim, Choi, et al. 2017	https://doi.org/10.1371/journal.pone.0182391
liver	Autoimmune hepatitis	95	1.3	5	0.26	given	AIR	0.67	given	AIR						100	Israel	1995	2010	Delgado et al. 2013	https://doi.org/10.1111/1751-2980.12085
liver	Autoimmune hepatitis	678	1.2	209	0.398095	calculated	avg IR	0.830476	calculated	avg IR						887	Finland	1995	2015	Puustinen et al. 2019	https://doi.org/10.1016/j.dld.2019.01.015
liver	Autoimmune hepatitis		2.4		0.93	given	AIR	1.68	given	AIR	2.57					1721	Denmark	1994	2012	Grønbæk et al. 2014	https://doi.org/10.1016/j.jhep.2013.10.020
liver	Autoimmune hepatitis	92		38												130	New_Zealand	1980	2006	Ngu et al. 2012	https://doi.org/10.1002/hep.24743
liver	Autoimmune hepatitis	94		62				0.23	given	IR						156	Canada	2000	2009	Jiménez-Rivera et al. 2015	https://doi.org/10.1542/peds.2015-0578
liver	Autoimmune hepatitis	865		255				1.1	given	IR						1110	Netherlands	2000	2010	van Gerven et al. 2014	https://doi.org/10.3109/00365521.2014.946083	incidence estimated for Amsterdam catchment area
liver	Autoimmune hepatitis		1.2		0.47	given	IR	0.85	given	IR						110	Sweden	1990	2003	Werner et al. 2008	https://doi.org/10.1080/00365520802130183	IR given for subset of catchment area
liver	Autoimmune hepatitis	53	4.22	17	1.46	given	AIR	2.88	given	AIR						70	USA	1990	2015	Sharma et al. 2017	https://journals.lww.com/ajg/Fulltext/2017/10001/Epidemiology,_Clinical_Characteristics_and.914.aspx
liver	Autoimmune hepatitis	20		5				1.92	given	IR						25	Norway	1986	1995	Boberg et al. 1998	https://doi.org/10.1080/00365529850166284
myeloid	Autoimmune hemolytic anemia	483	0.4	372	0.3	given	AIR						1.1	given	IR ratio	855	Sweden	1987	2010	Ji et al. 2016	https://doi.org/10.1016/j.jaut.2016.03.003
myeloid	Autoimmune hemolytic anemia	22		16				0.8	given	IR						38	USA	1988	2004	Klein et al. 2010	https://doi.org/10.1016/j.vaccine.2009.10.115
myeloid	Autoimmune hemolytic anemia	1518	1.30892	1197	1.04865	calculated	avg AIR over periods	1.27811	calculated	avg AIR						2715	Denmark	1980	2016	Hansen et al. 2020	https://doi.org/10.2147/CLEP.S250250
myeloid	Immune thrombocytopenic purpura	139	3.28	82	2.06	given	AIR	2.68	given	AIR						221	Denmark	1973	1995	Frederiksen & Schmidt 1999	https://doi.org/10.1182/blood.V94.3.909.415k02_909_913
myeloid	Immune thrombocytopenic purpura	504	4.5	336	3.2	given	IR	3.9	given	IR						840	UK	1992	2005	Abrahamson et al. 2009	https://doi.org/10.1111/j.1600-0609.2009.01247.x
myeloid	Immune thrombocytopenic purpura	3825	3.4	3438	3.2	given	AIR						1.1	given	IR ratio	7263	Sweden	1987	2010	Ji et al. 2016	https://doi.org/10.1016/j.jaut.2016.03.003
myeloid	Immune thrombocytopenic purpura	4307	2.58	2538	1.72	given	IR	2.16	given	IR						6845	Japan	2004	2007	Kurata et al. 2011	https://doi.org/10.1007/s12185-011-0791-1
myeloid	Immune thrombocytopenic purpura	80		65				2.9	given	IR						145	USA	1998	2004	Klein et al. 2010	https://doi.org/10.1016/j.vaccine.2009.10.115
myeloid	Immune thrombocytopenic purpura	50		42				5.3	given	IR	1.2					92	Norway	1996	1997	Zeller et al. 2000	https://doi.org/10.1080/08880010050122816
myeloid	Immune thrombocytopenic purpura		3.03		2.77	given	IR	2.9	given	IR						3771	France	2009	2011	Moulis et al. 2014	https://doi.org/10.1182/blood-2014-05-578336
myeloid	Immune thrombocytopenic purpura	134		111				1.6	given	IR						245	UK	1993	1999	Neylon et al. 2003	https://doi.org/10.1046/j.1365-2141.2003.04547.x
pancreas	Type 1 diabetes	492	9.3	662	12	given	IR	10.7	given	IR						1154	Spain	1987	1990	Goday et al. 1992	https://doi.org/10.1007/BF00400928
pancreas	Type 1 diabetes	6952	30.11	7769	32.03	calculated	avg IR	31.05	calculated	avg IR						14721	Sweden	1978	2007	Berhan et al. 2011	https://doi.org/10.2337/db10-0813
pancreas	Type 1 diabetes	584	17.3	560	15.6	given	AIR	16.5	given	AIR						1144	Australia	1985	2002	Haynes et al. 2004	https://doi.org/10.1007/s00125-004-1385-8
pancreas	Type 1 diabetes	234	10.5	267	11.3	given	AIR	10.9	given	AIR						501	Spain	1985	1988	Ríos et al. 1990	https://doi.org/10.1007/BF00404093
pancreas	Type 1 diabetes	1691	9.46	1908	10.154	calculated	avg IR	9.8	calculated	avg IR						3599	Austria	1979	2005	Schober et al. 2008	https://doi.org/10.1007/s00431-007-0480-5
pancreas	Type 1 diabetes	1919	24.39	2242	27.23	given	IR	25.67	given	IR						4161	USA	1998	2015	McCullough et al. 2021	https://doi.org/10.1016/j.socscimed.2021.113952
pancreas	Type 1 diabetes	1040	21.7	1126	22.3	given	AIR	22	given	AIR						2166	Denmark	1996	2005	Svensson et al. 2009	https://doi.org/10.1111/j.1399-5448.2008.00483.x
pancreas	Type 1 diabetes	2063	8.9	3823	16.4	given	AIR	12.7	given	AIR						5886	Sweden	1983	2002	Östman et al. 2008	https://doi.org/10.1111/j.1365-2796.2007.01896.x
pancreas	Type 1 diabetes	82	30.9	79	29.7	given	IR	30.3	given	IR						161	Sweden	1998	2001	Thunander et al. 2008	https://doi.org/10.1016/j.diabres.2008.07.022
pancreas	Type 1 diabetes	1631	19.8	1629	19.35	calculated	avg AIR	18.9	calculated	avg AIR						3260	Australia	1990	2002	Taplin et al. 2005	https://doi.org/10.5694/j.1326-5377.2005.tb07028.x
pancreas	Type 1 diabetes	485	8.6	940	15.9	given	AIR									1425	Sweden	1983	1987	Blohmé et al. 1992	https://doi.org/10.1007/BF00400852
pancreas	Type 1 diabetes	2263	0.81	2755	0.95	given	AIR	0.93	given	AIR						5018	China	2010	2013	Weng et al. 2018	https://doi.org/10.1136/bmj.j5295
pancreas	Type 1 diabetes	249	9.1	322	10.8	given	AIR	9.9	given	AIR						571	Belgium	1989	2000	Weets et al. 2002	https://doi.org/10.2337/diacare.25.5.840
pancreas	Type 1 diabetes	685	9.4	800	10.5	given	AIR									1485	Israel	1997	2003	Koton 2007	https://doi.org/10.1111/j.1399-5448.2007.00230.x
pancreas	Type 1 diabetes	148	16.8	162	17.5	given	AIR	17.2	given	AIR						310	Estonia	1999	2006	Teeäär et al. 2010	https://doi.org/10.1111/j.1399-5448.2009.00535.x
pancreas	Type 1 diabetes		12.66		12.73	given	crude IR	11.09	given	AIR						648	Israel	2000	2008	Sella et al. 2011	https://doi.org/10.1111/j.1464-5491.2010.03174.x	overall crude IR given as 12.69
pancreas	Type 1 diabetes							2.8	calculated	avg AIR over periods	1.3					496	Hong_Kong	2008	2017	Tung et al. 2020	https://doi.org/10.1111/pedi.13016
pancreas	Type 1 diabetes	316	3.2	306	3.1	given	AIR	3.1	given	AIR						622	China	1997	2011	Zhao et al. 2014	https://doi.org/10.1007/s00592-014-0590-2
pancreas	Type 1 diabetes	8692		11567												20259	Sweden	1983	2007	Dahlquist et al. 2011	https://doi.org/10.2337/dc11-0056
pancreas	Type 1 diabetes		2.52		1.91	given	estimated IR	2.25	given	estimated IR						2326	Japan	2005	2010	Onda et al. 2017	https://doi.org/10.1111/dme.13295
pancreas	Type 1 diabetes	89		87				13.7	given	AIR						176	Brazil	1986	2006	Negrato et al. 2010	https://doi.org/10.3275/6439	https://link.springer.com/article/10.1007/BF03346606
pancreas	Type 1 diabetes	73	6.5	93	7.8	given	IR	7.17	given	IR						166	France	1988	1999	Levy-Marchal et al. 1990	https://doi.org/10.1007/BF00405107
pancreas	Type 1 diabetes	53	5.4	90	9.2	given	IR	7.3	given	IR						143	Italy	1999	2001	Bruno et al. 2005	https://doi.org/10.2337/diacare.28.11.2613	ages 30-49
pancreas	Type 1 diabetes	4837	20.03	5387.5	21.35	calculated	avg IR	20.73	calculated	avg IR						10224.5	USA	2002	2012	Mayer-Davis et al. 2017	https://doi.org/10.1056/NEJMoa1610187	0-19 age; case counts from Table S1
pancreas	Type 1 diabetes	3456		3792				12.72	given	AIR						7248	Poland	1989	2012	Chobot et al. 2017	https://doi.org/10.1111/dme.13345
pancreas	Type 1 diabetes	598		683				14.8	given	AIR						1281	USA	1978	1988	Vehik et al. 2007	https://doi.org/10.2337/dc06-1837
pancreas	Type 1 diabetes	344		402				23.9	given	AIR						746	USA	2002	2004	Vehik et al. 2007	https://doi.org/10.2337/dc06-1837
pancreas	Type 1 diabetes		55.45		68.4333	calculated	avg AIR	62.0833	calculated	avg AIR						3332	Finland	2006	2011	Harjutsalo et al. 2013	https://doi.org/10.1001/jama.2013.8399
pancreas	Type 1 diabetes	218		256				14.1867	calculated	avg AIR						474	New_Zealand	1970	1982	Willis et al. 2002	https://doi.org/10.1515/jpem.2002.15.5.637
pancreas	Type 1 diabetes	5690		6377				17	calculated	avg AIR	0.833333					12067	France	2010	2015	Piffaretti et al. 2019	https://doi.org/10.1016/j.diabres.2018.11.005
pancreas	Type 1 diabetes		10		16	given	IR	13	given	AIR						1256	UK	1996	2005	González et al. 2009	https://doi.org/10.1136/jech.2008.080382
pancreas	Type 1 diabetes	1236		1049				45.9	given	IR						2285	USA	1998	2004	Klein et al. 2010	https://doi.org/10.1016/j.vaccine.2009.10.115
skin	Discoid lupus erythematosus	2574	2.3	819	0.8	given	AIR						3	given	IR ratio	3393	Sweden	1987	2010	Ji et al. 2016	https://doi.org/10.1016/j.jaut.2016.03.003
skin	Discoid lupus erythematosus	1350	2.75	292	0.63	given	IR	1.7	given	IR						1642	Denmark	1998	2013	Petersen et al. 2018	https://doi.org/10.1177/0961203318777103
skin	Discoid lupus erythematosus		4.1		2.99	given	AIR	3.56	given	AIR						129	USA	1965	2005	Durosaro et al. 2009	https://doi.org/10.1001/archdermatol.2009.21
skin	Discoid lupus erythematosus	479		178				2.42212	calculated	IR for those w/ no prior SLE						657	Sweden	2005	2007	Grönhagen et al. 2011	https://doi.org/10.1111/j.1365-2133.2011.10272.x
skin	Localized scleroderma	1992	1.8	676	0.6	given	AIR						2.8	given	IR ratio	2668	Sweden	1987	2010	Ji et al. 2016	https://doi.org/10.1016/j.jaut.2016.03.003
skin	Localized scleroderma	55	0.44	32	0.24	given	IR	0.34	given	IR						87	UK	2005	2007	Herrick et al. 2010	https://doi.org/10.1002/acr.20070
skin	Localized scleroderma	59		23				2.7	given	AIR						82	USA	1960	1993	Peterson et al. 1997	https://pubmed.ncbi.nlm.nih.gov/9002014/	PMID: 9002014
skin	Psoriasis	55010	50.8	47574	44.4	given	AIR						1.1	given	IR ratio	102584	Sweden	1987	2010	Ji et al. 2016	https://doi.org/10.1016/j.jaut.2016.03.003
skin	Psoriasis	805	73.2	828	85.5	given	AIR	78.9	given	avg AIR						1633	USA	1970	2000	Icen et al. 2009	https://doi.org/10.1016/j.jaad.2008.10.062
skin	Psoriasis	187	43.9	170	37.9	given	IR	40.8	given	AIR						357	USA	1970	1999	Tollefson et al. 2009	https://doi.org/10.1016/j.jaad.2009.07.029
skin	Psoriasis		58.4		63.6	given	AIR	60.4	given	AIR						132	USA	1980	1983	Bell et al. 1991	https://doi.org/10.1001/archderm.1991.01680070084010
skin	Psoriasis	42081	148.09	36483	129.845	calculated	avg IR	139.018	calculated	avg IR						78564	Denmark	2003	2012	Egeberg et al. 2017	https://doi.org/10.2340/00015555-2672
skin	Psoriasis	49787	160	54654	153.067	calculated	avg IR	156.4	calculated	avg AIR						104441	UK	1999	2013	Springate et al. 2017	https://doi.org/10.1111/bjd.15021
skin	Psoriasis		267.286		279.571	calculated	avg AIR	280	given	AIR						71095	Israel	2011	2014	Schonmann et al. 2019	https://doi.org/10.1111/jdv.15762
skin	Psoriasis		35.3725		30.1912	calculated	avg IR									20000	Germany	2009	2012	Sewerin et al. 2019	https://doi.org/10.1136/annrheumdis-2018-214065
skin	Psoriasis							89.425	calculated	avg AIR	0.970874					141208	Canada	2000	2015	Eder et al. 2019	https://doi.org/10.1002/acr.23743
skin	Psoriasis	4713		6341												11054	Korea	2002	2013	Kim, Han, et al. 2017	https://doi.org/10.1038/s41598-017-01983-y
skin	Psoriasis	3894		7738												11631	Japan	2002	2008	Takahashi et al. 2011	https://doi.org/10.1111/j.1346-8138.2010.01145.x
skin	Psoriasis	45673		43185				182	given	AIR						88858	UK	1998	2014	Tillett et al. 2017	https://doi.org/10.1093/rheumatology/kex323
small_intestine	Celiac's disease	21267	22.1	12273	12.4	given	AIR						1.8	given	IR ratio	33540	Sweden	1987	2010	Ji et al. 2016	https://doi.org/10.1016/j.jaut.2016.03.003
small_intestine	Celiac's disease	157	21.2091	92	13.5545	calculated	avg AIR	17.3182	calculated	avg AIR						249	USA	2000	2010	Ludvigsson et al. 2013	https://doi.org/10.1038/ajg.2013.60
small_intestine	Celiac's disease	5950	17.93	3137	9.6	given	AIR	13.8	given	AIR			1.85	given	adjusted RR	9087	UK	1990	2011	West et al. 2014	https://doi.org/10.1038/ajg.2014.55
small_intestine	Celiac's disease	64	1.55	37	0.96	given	IR	1.27	given	IR						101	Denmark	1976	1991	Bodé et al. 1996	https://doi.org/10.3109/00365529609009152
small_intestine	Celiac's disease	4049	45.57	2295	27.23	given	crude IR	36.64	given	IR						6344	Israel	2007	2015	Lechtmann et al. 2021	https://doi.org/10.1111/apt.16282	2021-08-12 DOI link broken; try: https://onlinelibrary.wiley.com/doi/full/10.1111/apt.16282
small_intestine	Celiac's disease	2602	6.338	1493	3.63	calculated	avg IR over periods	4.942	calculated	avg IR						4095	Netherlands	1995	2010	Burger et al. 2014	https://doi.org/10.3109/00365521.2014.915054	5 years during the period were used
small_intestine	Celiac's disease	7531	7.6	4019	4.1	given	IR	5.9	given	IR						11550	Denmark	1980	2016	Grode et al. 2018	https://doi.org/10.1097/MEG.0000000000000992
small_intestine	Celiac's disease							54	given	IR	1.52525					974	Spain	2006	2007	Cilleruelo et al. 2014	https://doi.org/10.1097/MPG.0000000000000446	they use 659 of 974 (selected catchments) to calculate IR
small_intestine	Celiac's disease	73		66				1.85	given	IR	0.909091					139	Estonia	1990	2010	Ress et al. 2012	https://doi.org/10.1007/s00431-012-1835-0
small_intestine	Celiac's disease	382		214												596	Finland	1966	2013	Kivelä et al. 2015	https://doi.org/10.1016/j.jpeds.2015.07.057
small_intestine	Celiac's disease	365		143				17	given	IR						508	Italy	2000	2003	Lanzini et al. 2005	https://doi.org/10.1080/00365520510023107
stomach	Autoimmune gastritis	2302	1.4	1960	1.5	given	AIR						0.9	given	IR ratio	4262	Sweden	1987	2010	Ji et al. 2016	https://doi.org/10.1016/j.jaut.2016.03.003
stomach	Autoimmune gastritis	206		114												320	China	2007	2014	Zhang et al. 2017	https://doi.org/10.1080/00365521.2016.1236397
stomach	Autoimmune gastritis	156		89												245	Japan	2010	2016	Terao et al. 2019	https://doi.org/10.1111/den.13500
thyroid	Graves' hyperthyroidism	47554	40.7	10217	9.2	given	AIR						4.4	given	IR ratio	57771	Sweden	1987	2010	Ji et al. 2016	https://doi.org/10.1016/j.jaut.2016.03.003
thyroid	Graves' hyperthyroidism	181	27.2	46	7.4	given	IR	17.7	given	AIR						228	Sweden	1970	1974	Berglund et al. 1990	https://doi.org/10.1111/j.1365-2796.1990.tb00132.x
thyroid	Graves' hyperthyroidism	126	34.4	29	8.8	given	IR	22.2	given	AIR						155	Sweden	1988	1990	Berglund et al. 1996	https://doi.org/10.1046/j.1365-2796.1996.415757000.x
thyroid	Graves' hyperthyroidism	217	36.8	39	8.3	given	IR									256	USA	1935	1967	Furszyfer et al. 1972	https://doi.org/10.1016/0026-0495(72)90041-8
thyroid	Graves' hyperthyroidism	171		37				12.093	calculated	calculated from catchment population						208	Sweden	1987	1989	Winsa et al. 1991	https://doi.org/10.1016/0140-6736(91)92298-g
thyroid	Graves' hyperthyroidism	343		61				21.4	given	IR						404	Sweden	2003	2005	Nyström et al. 2013	https://doi.org/10.1111/cen.12060
thyroid	Graves' hyperthyroidism	526	37.9	133	11	given	AIR	24.8	given	AIR						659	UK	2008	2013	Hussain et al. 2017	https://doi.org/10.1007/s12020-017-1306-5
thyroid	Graves' hyperthyroidism	5847		1016				12.2	given	IR						6863	Austria	1987	1995	Mostbeck et al. 1998	https://doi.org/10.1007/s002590050234
thyroid	Hashimoto's hypothyroidism	7341	440.375	1393	89.125	calculated	avg SIR									8734	UK	1994	2001	Leese et al. 2008	https://doi.org/10.1111/j.1365-2265.2007.03051.x	counts derived from provided N and IR
thyroid	Hashimoto's hypothyroidism	2969	498	500	88	given	IR									3469	UK	1993	1997	Flynn et al. 2004	https://doi.org/10.1210/jc.2003-032089
thyroid	Hashimoto's hypothyroidism	31130	27.6	6920	6.3	given	AIR						4.4	given	IR ratio	38050	Sweden	1987	2010	Ji et al. 2016	https://doi.org/10.1016/j.jaut.2016.03.003
thyroid	Hashimoto's hypothyroidism	460	44.4	118	11.9	given	IR									578	Denmark	1997	2000	Carlé et al. 2006	https://doi.org/10.1530/eje.1.02068
thyroid	Hashimoto's hypothyroidism	1369		152												1521	Taiwan	1998	2010	Chen et al. 2013	https://doi.org/10.1038/bjc.2013.597
