# Supplementary material for: Sex Biases in Cancer and Autoimmune Disease Incidence Are Strongly Positively Correlated with Mitochondrial Gene Expression across Human Tissues
Source: Cancers (Basel). 2022 Nov 29;14(23):5885. doi: 10.3390/cancers14235885 (PMC9736300; doi:10.3390/cancers14235885)
Supplement: Supplementary file 1 [file cancers-14-05885-s001.zip › cancers-1948266 Table S2_AIDs_Cancers_GTEx_samples.xlsx]

## Sheet: Sheet1
S2. Tissue-matched AIDs, Cancers, and GTEx samples
Tissue	Autoimmune disease	Cancer type	GTEx Tissue
Adrenal gland	Addison's disease (AD)	Adrenal gland (ADGL)	Adrenal gland
CNS	Multiple sclerosis (MS)	Central nervous system (CNS)	Brain
Colon	Ulcerative colitis (UC)	Colon (COLON)	Colon
Gallbladder & Biliary Tract	Primary biliary cholangitis (PBC)	Gallbladder & biliary tract (GBBT)	n/a
		Liver (biliary) cholangiosarcoma (BCS)
Kidney	Primary autoimmune membranous nephritis (MN)	Kidney (KDNY)	Kidney
	anti-GBM nephritis (aGBM)
Liver	Autoimmune hepatitis (AIH)	Liver carcinoma (LIC)	Liver
		Liver hepatoblastoma (LIHB)
		Liver sarcoma (LIS)
Myeloid	Autoimmune hemolytic anemia (AHA)	Multiple myeloma (MM)	n/a
	Immune thrombocytopenic purpura (ITP)	Myeloid leukemia (ML)
Pancreas	Type 1 diabetes (T1D)	Pancreas (PANC)	Pancreas
Skin	Psoriasis (Pso)	Melanoma of skin (SKM)	Skin
	Localized scleroderma (LS)
	Discoid lupus erythematosus (DLE)
Small intestine	Celiac disease (CD)	Small intestine (SMINT)	Small intestine
Stomach	Autoimmune gastritis (AG)	Stomach (STOM)	Stomach
Thyroid	Graves' hyperthyroidism (GH)	Thyroid carcinoma (THC)	Thyroid
	Hashimoto's hypothyroidism (HT)	Thyroid sarcoma (THS)
