# Supplementary material for: Sex Biases in Cancer and Autoimmune Disease Incidence Are Strongly Positively Correlated with Mitochondrial Gene Expression across Human Tissues
Source: Cancers (Basel). 2022 Nov 29;14(23):5885. doi: 10.3390/cancers14235885 (PMC9736300; doi:10.3390/cancers14235885)
Supplement: Supplementary file 1 [file cancers-14-05885-s001.zip › cancers-1948266 Table S3_Matched_AID_cancer_data.xlsx]

## Sheet: Sheet1
S3. Matched AID-cancer data
Country	Tissue	Autoimmune disease	AID IR Sex Bias	Cancer (mid resolution)	Cancer IR Sex Bias
Australia	CNS	Multiple sclerosis	-1.63864	CNS	0.460397
Australia	pancreas	Type 1 diabetes	-0.0900297	pancreas	0.136992
Austria	CNS	Multiple sclerosis	-0.678072	CNS	0.324581
Austria	pancreas	Type 1 diabetes	0.101568	pancreas	-0.0949469
Austria	thyroid	Graves' hyperthyroidism	-2.5248	thyroid__carcinoma	-1.27693
Austria	thyroid	Graves' hyperthyroidism	-2.5248	thyroid__sarcoma	-0.739485
Brazil	pancreas	Type 1 diabetes	-0.0327899	pancreas	0.00920834
Canada	CNS	Multiple sclerosis	-1.32761	CNS	0.397788
Canada	biliary	Primary biliary cholangitis	-2.21842	biliary__cholangiosarcoma	0.153146
Canada	biliary	Primary biliary cholangitis	-2.21842	biliary__gallbladder_biliary_tract	-0.380287
Canada	liver	Autoimmune hepatitis	-0.600393	liver__carcinoma	1.73702
Canada	liver	Autoimmune hepatitis	-0.600393	liver__hepatoblastoma	0.729064
Canada	liver	Autoimmune hepatitis	-0.600393	liver__sarcoma	0.630407
Canada	skin	Psoriasis	0.0439433	skin__melanoma	0.132231
China	pancreas	Type 1 diabetes	0.098682	pancreas	0.202794
China	stomach	Autoimmune gastritis	-0.853611	stomach	0.843801
Denmark	CNS	Multiple sclerosis	-0.285216	CNS	0.381365
Denmark	biliary	Primary biliary cholangitis	-1.91302	biliary__cholangiosarcoma	-0.0805322
Denmark	biliary	Primary biliary cholangitis	-1.91302	biliary__gallbladder_biliary_tract	-0.749263
Denmark	colon	Ulcerative colitis	-0.0650116	colon	-0.191497
Denmark	kidney	Autoimmune MN	0.645335	kidney	0.587399
Denmark	liver	Autoimmune hepatitis	-1.36773	liver__carcinoma	1.42638
Denmark	liver	Autoimmune hepatitis	-1.36773	liver__hepatoblastoma	0.785104
Denmark	liver	Autoimmune hepatitis	-1.36773	liver__sarcoma	0.550137
Denmark	myeloid	Immune thrombocytopenic purpura	-0.671051	myeloid__leukaemia	0.290975
Denmark	myeloid	Immune thrombocytopenic purpura	-0.671051	myeloid__multiple_myeloma	0.27626
Denmark	myeloid	Autoimmune hemolytic anemia	-0.319177	myeloid__leukaemia	0.290975
Denmark	myeloid	Autoimmune hemolytic anemia	-0.319177	myeloid__multiple_myeloma	0.27626
Denmark	pancreas	Type 1 diabetes	0.0393487	pancreas	-0.025933
Denmark	skin	Discoid lupus erythematosus	-2.12601	skin__melanoma	-0.309641
Denmark	skin	Psoriasis	-0.189628	skin__melanoma	-0.309641
Denmark	small_intestine	Celiac's disease	-0.787333	small_intestine	0.134048
Denmark	thyroid	Hashimoto's hypothyroidism	-1.8996	thyroid__carcinoma	-1.3205
Denmark	thyroid	Hashimoto's hypothyroidism	-1.8996	thyroid__sarcoma	-0.598111
Estonia	biliary	Primary biliary cholangitis	-4.42626	biliary__cholangiosarcoma	0.0576298
Estonia	biliary	Primary biliary cholangitis	-4.42626	biliary__gallbladder_biliary_tract	-0.76795
Estonia	pancreas	Type 1 diabetes	0.0588937	pancreas	0.227784
Estonia	small_intestine	Celiac's disease	-0.14543	small_intestine	0.108954
Finland	CNS	Multiple sclerosis	-0.840246	CNS	-0.501604
Finland	biliary	Primary biliary cholangitis	-2.09516	biliary__gallbladder_biliary_tract	-0.67208
Finland	colon	Ulcerative colitis	-0.0285692	colon	-0.0800076
Finland	pancreas	Type 1 diabetes	0.303441	pancreas	-0.067352
Finland	small_intestine	Celiac's disease	-0.835962	small_intestine	0.321563
France	colon	Ulcerative colitis	0.460207	colon	0.187036
France	myeloid	Immune thrombocytopenic purpura	-0.129432	myeloid__leukaemia	0.393358
France	myeloid	Immune thrombocytopenic purpura	-0.129432	myeloid__multiple_myeloma	0.114397
France	pancreas	Type 1 diabetes	0.214584	pancreas	0.335802
Germany	CNS	Multiple sclerosis	-1.3418	CNS	0.301992
Germany	adrenal_glands	Addison's disease	-0.627398	adrenal_glands	0.021398
Germany	colon	Ulcerative colitis	0.0824622	colon	-0.190861
Germany	skin	Psoriasis	-0.228455	skin__melanoma	-0.0864699
Hong_Kong	biliary	Primary biliary cholangitis	-1.75207	biliary__gallbladder_biliary_tract	0.0730795
Hong_Kong	pancreas	Type 1 diabetes	-0.378512	pancreas	0.33952
Iceland	biliary	Primary biliary cholangitis	-2.22882	biliary__cholangiosarcoma	-0.0436762
Iceland	biliary	Primary biliary cholangitis	-2.22882	biliary__gallbladder_biliary_tract	-0.565345
Ireland	CNS	Multiple sclerosis	-1.39855	CNS	0.45228
Ireland	kidney	anti-GBM	0.330149	kidney	0.828284
Israel	CNS	Multiple sclerosis	-1.15401	CNS	0.37864
Israel	biliary	Primary biliary cholangitis	-4.23786	biliary__cholangiosarcoma	0.165837
Israel	biliary	Primary biliary cholangitis	-4.23786	biliary__gallbladder_biliary_tract	-0.948497
Israel	liver	Autoimmune hepatitis	-2.32193	liver__carcinoma	1.12825
Israel	liver	Autoimmune hepatitis	-2.32193	liver__hepatoblastoma	0.493896
Israel	liver	Autoimmune hepatitis	-2.32193	liver__sarcoma	-0.119286
Israel	pancreas	Type 1 diabetes	0.0857989	pancreas	0.228449
Israel	skin	Psoriasis	0.0648037	skin__melanoma	-0.0851882
Israel	small_intestine	Celiac's disease	-0.742887	small_intestine	0.333485
Italy	CNS	Multiple sclerosis	-1.02531	CNS	0.371045
Italy	biliary	Primary biliary cholangitis	-1.03332	biliary__cholangiosarcoma	0.565523
Italy	biliary	Primary biliary cholangitis	-1.03332	biliary__gallbladder_biliary_tract	-0.445287
Italy	pancreas	Type 1 diabetes	0.768674	pancreas	0.132026
Italy	small_intestine	Celiac's disease	-1.35188	small_intestine	0.465124
Japan	adrenal_glands	Addison's disease	-1.18442	adrenal_glands	0.528083
Japan	liver	Autoimmune hepatitis	-2.05627	liver__carcinoma	1.49871
Japan	liver	Autoimmune hepatitis	-2.05627	liver__hepatoblastoma	0.571869
Japan	liver	Autoimmune hepatitis	-2.05627	liver__sarcoma	0.587667
Japan	myeloid	Immune thrombocytopenic purpura	-0.584963	myeloid__leukaemia	0.611985
Japan	myeloid	Immune thrombocytopenic purpura	-0.584963	myeloid__multiple_myeloma	0.121247
Japan	pancreas	Type 1 diabetes	-0.399851	pancreas	0.33883
Japan	skin	Psoriasis	0.990708	skin__melanoma	0.0597952
Japan	stomach	Autoimmune gastritis	-0.809669	stomach	1.00968
Korea	biliary	Primary biliary cholangitis	-2.30677	biliary__cholangiosarcoma	0.671564
Korea	biliary	Primary biliary cholangitis	-2.30677	biliary__gallbladder_biliary_tract	-0.0370933
Korea	colon	Ulcerative colitis	-0.105353	colon	0.41529
Korea	kidney	Autoimmune MN	1.22948	kidney	1.12678
Korea	liver	Autoimmune hepatitis	-2.5615	liver__carcinoma	1.80841
Korea	liver	Autoimmune hepatitis	-2.5615	liver__hepatoblastoma	0.310298
Korea	liver	Autoimmune hepatitis	-2.5615	liver__sarcoma	0.490067
Korea	skin	Psoriasis	0.428065	skin__melanoma	-0.0730947
Kuwait	CNS	Multiple sclerosis	-0.781926	CNS	0.608969
Netherlands	CNS	Multiple sclerosis	-1.8365	CNS	0.487546
Netherlands	biliary	Primary biliary cholangitis	-2.66297	biliary__cholangiosarcoma	0.00566292
Netherlands	biliary	Primary biliary cholangitis	-2.66297	biliary__gallbladder_biliary_tract	-0.398987
Netherlands	colon	Ulcerative colitis	0.441269	colon	-0.0271345
Netherlands	kidney	anti-GBM	-0.0627358	kidney	0.667091
Netherlands	kidney	Autoimmune MN	1.08342	kidney	0.667091
Netherlands	liver	Autoimmune hepatitis	-1.7622	liver__carcinoma	1.49357
Netherlands	liver	Autoimmune hepatitis	-1.7622	liver__hepatoblastoma	0.607973
Netherlands	liver	Autoimmune hepatitis	-1.7622	liver__sarcoma	-0.011515
Netherlands	small_intestine	Celiac's disease	-0.804513	small_intestine	0.175351
New_Zealand	biliary	Primary biliary cholangitis	-2.32193	biliary__cholangiosarcoma	0.0299016
New_Zealand	biliary	Primary biliary cholangitis	-2.32193	biliary__gallbladder_biliary_tract	-0.461838
New_Zealand	liver	Autoimmune hepatitis	-1.1652	liver__carcinoma	1.89958
New_Zealand	liver	Autoimmune hepatitis	-1.1652	liver__hepatoblastoma	1.23925
New_Zealand	liver	Autoimmune hepatitis	-1.1652	liver__sarcoma	0.168179
New_Zealand	pancreas	Type 1 diabetes	0.231816	pancreas	0.0858342
Norway	CNS	Multiple sclerosis	-0.983369	CNS	0.426972
Norway	colon	Ulcerative colitis	0.215394	colon	-0.205529
Norway	liver	Autoimmune hepatitis	-2	liver__carcinoma	1.14705
Norway	liver	Autoimmune hepatitis	-2	liver__hepatoblastoma	0.672245
Norway	liver	Autoimmune hepatitis	-2	liver__sarcoma	-0.769429
Norway	myeloid	Immune thrombocytopenic purpura	-0.251539	myeloid__leukaemia	0.24725
Norway	myeloid	Immune thrombocytopenic purpura	-0.251539	myeloid__multiple_myeloma	0.298984
Poland	CNS	Multiple sclerosis	-1.36184	CNS	0.175229
Poland	pancreas	Type 1 diabetes	0.133856	pancreas	0.124175
Spain	biliary	Primary biliary cholangitis	-4.80735	biliary__cholangiosarcoma	0.425515
Spain	biliary	Primary biliary cholangitis	-4.80735	biliary__gallbladder_biliary_tract	-0.833123
Spain	colon	Ulcerative colitis	0.340075	colon	0.359739
Spain	pancreas	Type 1 diabetes	0.242763	pancreas	0.267853
Spain	small_intestine	Celiac's disease	-0.613532	small_intestine	0.609472
Sweden	CNS	Multiple sclerosis	-1.00619	CNS	-0.168813
Sweden	adrenal_glands	Addison's disease	-0.319251	adrenal_glands	-0.350142
Sweden	biliary	Primary biliary cholangitis	-2	biliary__gallbladder_biliary_tract	-0.828285
Sweden	colon	Ulcerative colitis	0.218669	colon	-0.048348
Sweden	kidney	Autoimmune MN	0.768674	kidney	0.691526
Sweden	liver	Autoimmune hepatitis	-1.40487	liver	1.05113
Sweden	myeloid	Autoimmune hemolytic anemia	-0.415037	myeloid__multiple_myeloma	0.355268
Sweden	myeloid	Autoimmune hemolytic anemia	-0.415037	myeloid__leukaemia	0.2935
Sweden	myeloid	Immune thrombocytopenic purpura	-0.0874628	myeloid__multiple_myeloma	0.355268
Sweden	myeloid	Immune thrombocytopenic purpura	-0.0874628	myeloid__leukaemia	0.2935
Sweden	pancreas	Type 1 diabetes	0.495128	pancreas	-0.0236161
Sweden	skin	Discoid lupus erythematosus	-1.47507	skin__melanoma	0.0574737
Sweden	skin	Localized scleroderma	-1.58496	skin__melanoma	0.0574737
Sweden	skin	Psoriasis	-0.194269	skin__melanoma	0.0574737
Sweden	small_intestine	Celiac's disease	-0.833706	small_intestine	0.360832
Sweden	stomach	Autoimmune gastritis	0.0995357	stomach	0.659745
Sweden	thyroid	Graves' hyperthyroidism	-2.12264	thyroid	-1.40429
Sweden	thyroid	Hashimoto's hypothyroidism	-2.13124	thyroid	-1.40429
Switzerland	biliary	Primary biliary cholangitis	-2.45763	biliary__cholangiosarcoma	0.223991
Switzerland	biliary	Primary biliary cholangitis	-2.45763	biliary__gallbladder_biliary_tract	-0.707414
Taiwan	CNS	Multiple sclerosis	-1.32193	CNS	0.349942
Turkey	colon	Ulcerative colitis	0.768674	colon	0.442171
UK	CNS	Multiple sclerosis	-1.21573	CNS	0.483252
UK	biliary	Primary biliary cholangitis	-3.13713	biliary__cholangiosarcoma	-0.0792835
UK	biliary	Primary biliary cholangitis	-3.13713	biliary__gallbladder_biliary_tract	-0.55164
UK	colon	Ulcerative colitis	0.142835	colon	-0.0616282
UK	kidney	Autoimmune MN	0.925999	kidney	0.688828
UK	liver	Autoimmune hepatitis	-1.5112	liver__carcinoma	1.68338
UK	liver	Autoimmune hepatitis	-1.5112	liver__hepatoblastoma	0.384276
UK	liver	Autoimmune hepatitis	-1.5112	liver__sarcoma	0.552288
UK	myeloid	Immune thrombocytopenic purpura	-0.377567	myeloid__leukaemia	0.23318
UK	myeloid	Immune thrombocytopenic purpura	-0.377567	myeloid__multiple_myeloma	0.170699
UK	pancreas	Type 1 diabetes	0.678072	pancreas	-0.00766847
UK	skin	Psoriasis	-0.072321	skin__melanoma	-0.353873
UK	skin	Localized scleroderma	-0.874469	skin__melanoma	-0.353873
UK	small_intestine	Celiac's disease	-0.901269	small_intestine	0.171786
UK	thyroid	Hashimoto's hypothyroidism	-2.39935	thyroid__carcinoma	-1.51537
UK	thyroid	Hashimoto's hypothyroidism	-2.39935	thyroid__sarcoma	-0.815587
UK	thyroid	Graves' hyperthyroidism	-1.78469	thyroid__carcinoma	-1.51537
UK	thyroid	Graves' hyperthyroidism	-1.78469	thyroid__sarcoma	-0.815587
USA	CNS	Multiple sclerosis	-1.32692	CNS	0.383729
USA	biliary	Primary biliary cholangitis	-3.25919	biliary__cholangiosarcoma	0.210627
USA	biliary	Primary biliary cholangitis	-3.25919	biliary__gallbladder_biliary_tract	-0.441764
USA	colon	Ulcerative colitis	0.336845	colon	-0.0634652
USA	kidney	anti-GBM	0.0883559	kidney	0.783225
USA	kidney	Autoimmune MN	0.439595	kidney	0.783225
USA	liver	Autoimmune hepatitis	-1.53127	liver__carcinoma	1.59586
USA	liver	Autoimmune hepatitis	-1.53127	liver__hepatoblastoma	0.425988
USA	liver	Autoimmune hepatitis	-1.53127	liver__sarcoma	0.215597
USA	myeloid	Autoimmune hemolytic anemia	-0.459432	myeloid__leukaemia	0.33828
USA	myeloid	Autoimmune hemolytic anemia	-0.459432	myeloid__multiple_myeloma	0.243362
USA	myeloid	Immune thrombocytopenic purpura	-0.29956	myeloid__leukaemia	0.33828
USA	myeloid	Immune thrombocytopenic purpura	-0.29956	myeloid__multiple_myeloma	0.243362
USA	pancreas	Type 1 diabetes	0.095396	pancreas	0.0213876
USA	skin	Discoid lupus erythematosus	-0.455478	skin__melanoma	0.315288
USA	skin	Psoriasis	0.0567683	skin__melanoma	0.315288
USA	skin	Localized scleroderma	-1.35908	skin__melanoma	0.315288
USA	small_intestine	Celiac's disease	-0.646452	small_intestine	0.24158
USA	thyroid	Graves' hyperthyroidism	-2.14852	thyroid__carcinoma	-1.5321
USA	thyroid	Graves' hyperthyroidism	-2.14852	thyroid__sarcoma	0.426478
