# Supplementary material for: Sex Biases in Cancer and Autoimmune Disease Incidence Are Strongly Positively Correlated with Mitochondrial Gene Expression across Human Tissues
Source: Cancers (Basel). 2022 Nov 29;14(23):5885. doi: 10.3390/cancers14235885 (PMC9736300; doi:10.3390/cancers14235885)
Supplement: Supplementary file 1 [file cancers-14-05885-s001.zip › cancers-1948266 Table S4_Cancer_AID_incidence_rate_averages.xlsx]

## Sheet: Sheet1
Table S4. Cancer and AID incidence rate averages.
Incidence rates given as cases per 100,000 persons per year
	Autoimmune Diseases					Cancers
Tissue	Disease	Average Male Incidence Rate	Average Female Incidence Rate	Ratio of Average Male to Average Female Incidence Rate	Incidence Rate Sex Bias	Type	Average Male Incidence Rate	Average Female Incidence Rate	Ratio of Average Male to Average Female Incidence Rate	Incidence Rate Sex Bias
Adrenal gland	Addison's disease (AD)	1	1.3	1 : 1.30	-0.378512	Adrenal gland (ADGL)	0.298099	0.282657	1.05 : 1	0.0767424
CNS	Multiple sclerosis (MS)	3.58382	8.20127	1: 2.29	-1.19435	Central nervous system (CNS)	6.45292	5.31744	1.21 : 1	0.279221
Colon	Ulcerative colitis (UC)	9.61616	8.34338	1.15 : 1	0.204829	Colon (COLON)	25.5566	24.3788	1.05 : 1	0.0680689
Gallbladder & Biliary Tract	Primary biliary cholangitis (PBC)	0.499058	2.87185	1 : 5.75	-2.5247	Gallbladder & biliary tract (GBBT)	3.13588	5.25491	1 : 1.68	-0.744798
						Liver (biliary) cholangiosarcoma (BCS)	0.83687	0.688567	1.22 : 1	0.281407
Kidney	Primary autoimmune membranous nephritis (MN)	0.784179	0.445821	1.76 : 1	0.81472	Kidney (KDNY)	10.3195	6.15028	1.68 : 1	0.746651
	anti-GBM nephritis (aGBM)	0.182684	0.145316	1.26 : 1	0.330149
Liver	Autoimmune hepatitis (AIH)	0.703059	2.20402	1 : 3.13	-1.64842	Liver carcinoma (LIC)	5.16511	1.73838	2.97 : 1	1.57106
						Liver hepatoblastoma (LIHB)	0.0408784	0.0255483	1.60 : 1	0.678109
						Liver sarcoma (LIS)	0.0329669	0.0277774	1.19 : 1	0.247103
Myeloid	Autoimmune hemolytic anemia (AHA)	0.674561	0.878772	1 : 1.30	-0.381539	Multiple myeloma (MM)	3.79841	3.35669	1.13 : 1	0.178358
	Immune thrombocytopenic purpura (ITP)	2.78772	3.48228	1 : 1.25	-0.320948	Myeloid leukemia (ML)	3.81097	3.09583	1.23 : 1	0.299832
Pancreas	Type 1 diabetes (T1D)	16.1324	14.2631	1.13 : 1	0.17767	Pancreas (PANC)	9.51674	8.64745	1.10 : 1	0.138192
Skin	Psoriasis (Pso)	114.589	117.381	1 : 1.02	-0.0347301	Melanoma of skin (SKM)	9.08516	9.54973	1 : 1.05	-0.0719481
	Localized scleroderma (LS)	0.784878	2.04179	1 : 2.60	-1.37929
	Discoid lupus erythematosus (DLE)	1.55855	3.25478	1 : 2.09	-1.06236
Small intestine	Celiac disease (CD)	13.6617	23.2677	1 : 1.70	-0.768192	Small intestine (SMINT)	1.08677	0.891237	1.22 : 1	0.286162
Stomach	Autoimmune gastritis (AG)	1.5	1.4	1.07 : 1	0.0995357	Stomach (STOM)	23.3574	14.0538	1.66 : 1	0.732924
Thyroid	Graves' hyperthyroidism (GH)	7.53623	31.7978	1 : 4.22	-2.07701	Thyroid carcinoma (THC)	2.5047	8.93186	1 : 3.57	-1.83432
	Hashimoto's hypothyroidism (HT)	35.5883	180.397	1 : 5.07	-2.3417	Thyroid sarcoma (THS)	0.00472454	0.0116044	1 : 2.46	-1.29643
