# Supplementary material for: Sex Biases in Cancer and Autoimmune Disease Incidence Are Strongly Positively Correlated with Mitochondrial Gene Expression across Human Tissues
Source: Cancers (Basel). 2022 Nov 29;14(23):5885. doi: 10.3390/cancers14235885 (PMC9736300; doi:10.3390/cancers14235885)
Supplement: Supplementary file 1 [file cancers-14-05885-s001.zip › cancers-1948266 Table S5_Expanded_cancer_groups.xlsx]

## Sheet: Sheet1
Table S5. Expanded cancer classifications
	Cancer, GLOBOCAN (ICD-10)			Cancer, Sweden (ICD-7)			Cancer, Finland (ICD-10)	Cancer, Taiwan (ICD-10)
Tissue	Low resolution	Mid resolution	High resolution	Low resolution	Mid resolution	High resolution	Low resolution	Low resolution
Adrenal gland	Adrenal gland (C74)	Adrenal gland (C74)	Adrenal gland (C74)	Adrenal (195.0)	Adrenal (195.0)	Adrenal (195.0)	(none)	(none)
CNS	Brain (C71); other CNS (C72)	Brain (C71); other CNS (C72)	Brain (C71); other CNS (C72)	CNS (193.0, 193.1)	CNS (193.0, 193.1)	CNS (193.0, 193.1)	CNS (C70-72, D32-33, D42-43)	Brain, CNS (C70-72)
Colon	Colon (C18)	Colon (C18)	Colon (C18)	Colon (153)	Colon (153)	Colon (153)	Colon (C18)	(none)
Gallbladder & Biliary Tract	Biliary tract	Gallbladder (C23) & Biliary tract (C24)	Gallbladder (C23) & Biliary tract (C24)	Gallbladder (155.1)	Gallbladder (155.1)	Gallbladder (155.1)	Gallbladder (C23) & Biliary tract (C24)	(none)
		Liver (C22), Cholangiosarcoma	Liver (C22), Cholangiosarcoma
Kidney	Kidney (C64)	Kidney (C64)	Kidney (C64)	Kidney (180)	Kidney (180)	Kidney (180)	(none)	(none)
Liver	Liver (C22), Hepatocellular carcinoma	Liver carcinoma (LIC)	Liver hepatocellular carcinoma (LIHC)	Liver, primary (155.0)	Liver, primary (155.0)	Liver, primary (155.0)	Liver (C22)	(none)
		Liver hepatoblastoma (LIHB)	Liver hepatoblastoma (LIHB)
		Liver sarcoma (LIS)	Liver hemangiosarcoma (LIHS)
Myeloid	Myeloid	Multiple myeloma (C90)	Multiple myeloma (C90)	Myeloid	Multiple myeloma (203)	MM (203)	(none)	(none)
		Myeloid leukemia (C92-C94)	Acute ML		Myeloid leukemia	AML (205.0)
			Chronic ML			CML (205.1)
Pancreas	Pancreas (C25)	Pancreas (C25)	Pancreas (C25)	Pancreas (C25)	Pancreas (C25)	Pancreas (C25)	Pancreas (C25)	(none)
Skin	Melanoma of skin (C43)	Melanoma of skin (C43)	Melanoma of skin (C43)	Skin (all)	Skin melanoma (190)	Skin melanoma (190)	(none)	(none)
					Skin not melanoma (191)	Skin not melanoma (191)
Small intestine	Small intestine (C17)	Small intestine (C17)	Small intestine (C17)	Small intestine (152)	Small intestine (152)	Small intestine (152)	Small intestine (C17)	(none)
Stomach	Stomach (C16)	Stomach (C16)	Stomach (C16)	Stomach (151)	Stomach (151)	Stomach (151)	(none)	(none)
Thyroid	Thyroid (C73)	Thyroid carcinoma	Thyroid follicular carcinoma	Thyroid (194)	Thyroid (194)	Thyroid (194)	(none)	Thyroid (C73)
			Thyroid papillary carcinoma
			Thyroid medullary carcinoma
			Thyroid anaplastic carcinoma
		Thyroid sarcoma	Thyroid sarcoma
