# Supplementary material for: Sex Biases in Cancer and Autoimmune Disease Incidence Are Strongly Positively Correlated with Mitochondrial Gene Expression across Human Tissues
Source: Cancers (Basel). 2022 Nov 29;14(23):5885. doi: 10.3390/cancers14235885 (PMC9736300; doi:10.3390/cancers14235885)
Supplement: Supplementary file 1 [file cancers-14-05885-s001.zip › cancers-1948266 Table S6_Human_mitochondrial_genes.xlsx]

## Sheet: Sheet1
	OMIM gene entry	HGNC symbol	Gene common name (without MT-)	Gene synonyms	Name	Protein coding?	Gene product	Protein length	Autoimmune disease associations	References	Cancer associations	References
	590070	MT-TF	TRNF	none	mitochondrially encoded tRNA phenylalanine	tRNA	tRNA-Phe	NA
	561000	MT-RNR1	RNR1	MTRNR1	mitochondrially encoded 12S RNA	rRNA	s-rRNA	NA	The 709G>A polymorphism is associated with Behçet's disease	Xavier et al., 2011, Annals of the Rheumatic Diseases (PMID 21345811)	somatic mutation in esophageal cancer and breast cancer and melanoma	Tan et al., 2006, BMC Cancer (PMID16620376); Zhu et al., 2005, Carcinogenesis (PMID 15375011); Mithani et al., 2008, Melanoma Research (PMID 18477896)
	590105	MT-TV	TRNV	MTTV	mitochondrially encoded tRNA valine	tRNA	tRNA-Val	NA
	561010	MT-RNR2	RNR2	MTRNR2	mitochondrially encoded 16S RNA	rRNA	l-rRNA	NA			somatic mutation in bladder cancer and head and neck cancer and lung cancer and breast cancer and melanoma	Fliss et al., 2000, Science (PMID 10720328); Zhu et al., 2005 Carcinogenesis (PMID 15375011); Mithani et al., 2008, Melanoma Research (PMID 18477896)
						protein	Humanin	24aa
	590050	MT-TL1	TRNL1	MTTL1	mitochondrially encoded tRNA leucine 1 (UUA/G)	tRNA	tRNA-Leu	NA			somatic mutation in lung cancer	Fliss et al., 2000, Science (PMID 10720328)
	516000	MT-ND1	ND1	MTND1	mitochondrially encoded NADH dehydrogenase 1	protein	NADH dehydrogenase subunit 1	428aa	somatic mutations associated with rheumatoid arthritis	Da Sylva et al. 2005 Arthritis Research & Therapy (PMID 15987484)	somatic mutation in thyroid cancer and leukemia and liver cancer and breast cancer and renal cancer and melanoma	Yeh et al., 2000, Oncogene (PMID 10803467); He et al., 2003, Leukemia (PMID14523470); Yin et al., 2010, Mitochondrion (PMID20006738) ; Parella et al., 2001 Cancer Research (11606403); T. M. Horton et al., 1996, Genes, Chromosomes & Cancer (PMID 8834172); Zhu et al., 2005 Carcinogenesis (PMID 15375011); Máximo et al., 2002, American Journal of Pathology (PMID 12000737); Mithani et al., 2008, Melan…
	590045	MT-TI	TRNI	MTTI	mitochondrially encoded tRNA isoleucine	tRNA	tRNA-Ile	NA			somatic mutation in breast cancer	Zhu et al., 2005 Carcinogenesis (PMID 15375011)
	590030	MT-TQ	TRNQ	MTTQ	mitochondrially encoded tRNA glutamine	tRNA	tRNA-Gln	NA
	590065	MT-TM	TRNM	MTTM	mitochondrially encoded tRNA methionine	tRNA	tRNA-Met	NA			somatic mutations in melanoma	Mithani et al., 2008, Melanoma Research (PMID 18477896)
	516001	MT-ND2	ND2	MTND2	mitochondrially encoded NADH dehydrogenase 2	protein	NADH dehydrogenase subunit 2	479aa			somatic mutations in thyroid cancer and breast cancer and melanoma	Yeh et al., 2000, Oncogene (PMID 10803467); Zhu et al., 2005 Carcinogenesis (PMID 15375011); Mithani et al., 2008, Melanoma Research (PMID 18477896)
	590095	MT-TW	TRNW	MTTW	mitochondrially encoded tRNA tryptophan	tRNA	tRNA-Trp	NA			somatic mutation in lung cancer	Fliss et al., 2000, Science (PMID 10720328)
	590000	MT-TA	TRNA	MTTA	mitochondrially encoded tRNA alanine	tRNA	tRNA-Ala	NA
	590010	MT-TN	TRNN	MTTN	mitochondrially encoded tRNA asparagine	tRNA	tRNA-Asn	NA
	590020	MT-TC	TRNC	MMTC	mitochondrially encoded tRNA cysteine	tRNA	tRNA-Cys	NA			somatic mutation in colorectal cancer	Polyak et al., 1998, Nature Genetics (PMID 9806551)
	590100	MT-TY	TRNY	MTTY	mitochondrially encoded tRNA tyrosine	tRNA	tRNA-Tyr	NA
	516030	MT-CO1	COX1	MTCO1	mitochondrially encoded cytochrome c oxidase I	protein	cytochrome c oxidase subunit I	711aa			somatic mutation in colorectal cancer and thyroid cancer and liver cancer and prostate cancer and melanoma	Greaves et al., 2006 PNAS (PMID 16407113); Yeh et al., 2000, Oncogene (PMID 10803467); Yin et al., 2010, Mitochondrion (PMID20006738) ; Petros et al., 2005, PNAS (PMID 15647368); Mithani et al., 2008, Melanoma Research (PMID 18477896)
	590080	MT-TS1	TRNS1	MTTS1	mitochondrially encoded tRNA serine 1 (UCN)	tRNA	tRNA-Ser	NA
	590015	MT-TD	TRND	MTTD	mitochondrially encoded tRNA aspartic acid	tRNA	tRNA-Asp	NA
	516040	MT-CO2	COX2	COII, MTCO2	mitochondrially encoded cytochrome c oxidase II	protein	cytochrome c oxidase subunit II	315aa			somatic mutation in colorectal cancer and liver cancer and thyroid cancer	Polyak et al., 1998, Nature Genetics (PMID 9806551); Yin et al., 2010, Mitochondrion (PMID20006738) ; Máximo et al., 2002, American Journal of Pathology (PMID 12000737)
	590060	MT-TK	TRNK	MTTK	mitochondrially encoded tRNA lysine	tRNA	tRNA-Lys	NA
	516070	MT-ATP8	ATP8	ATPase8, MTATP8	mitochondrially encoded ATP synthase 8	protein	ATP synthase F0 subunit 8	90aa			somatic mutations in thyroid cancer	Yeh et al., 2000, Oncogene (PMID 10803467)
	516060	MT-ATP6	ATP6	ATPase6, MTATP6	mitochondrially encoded ATP synthase 6	protein	ATP synthase F0 subunit 6	314aa			somatic mutations in esophageal cancer and prostate cancer and thyroid cancer and melanoma	Tan et al., 2006, BMC Cancer (PMID16620376); Petros et al., 2005, PNAS (PMID 15647368); Máximo et al., 2002, American Journal of Pathology (PMID 12000737); Mithani et al., 2008, Melanoma Research (PMID 18477896)
	516050	MT-CO3	COX3	COIII, MTCO3	mitochondrially encoded cytochrome c oxidase III	protein	cytochrome c oxidase subunit III	349aa			somatic mutations in liver cancer and breast cancer and thyroid cancer and melanoma	Yin et al., 2010, Mitochondrion (PMID20006738); Zhu et al., 2005 Carcinogenesis (PMID 15375011); Máximo et al., 2002, American Journal of Pathology (PMID 12000737); Mithani et al., 2008, Melanoma Research (PMID 18477896)
	590035	MT-TG	TRNG	MTTG	mitochondrially encoded tRNA glycine	tRNA	tRNA-Gly	NA
	516002	MT-ND3	ND3	MTND3	mitochondrially encoded NADH dehydrogenase 3	protein	NADH dehydrogenase subnit 3	159aa			germline G10398A polymorphism associated with increased risk for breast cancer and esophageal cancer; somatic mutations in thyroid cancer and bladder cancer and melanoma	Darvishi et al. 2007 Cancer Letters (PMID 17081685); Yeh et al., 2000, Oncogene (PMID 10803467); Fliss et al., 2000, Science (PMID 10720328); Máximo et al., 2002, American Journal of Pathology (PMID 12000737); Mithani et al., 2008, Melanoma Research (PMID 18477896)
	590005	MT-TR	TRNR	MTTR	mitochondrially encoded tRNA arginine	tRNA	tRNA-Arg				somatic mutations in melanoma	Mithani et al., 2008, Melanoma Research (PMID 18477896)
	516004	MT-ND4L	ND4L	MTND4L	mitochondrially encoded NADH 4L dehydrogenase	protein	NADH dehydrogenase subunit 4L	120aa			somatic mutations in colorectal cancer and esophageal cancer	Polyak et al., 1998, Nature Genetics (PMID 9806551); Tan et al., 2006, BMC Cancer (PMID16620376)
	516003	MT-ND4	ND4	MTND4	mitochondrially encoded NADH dehydrogenase 4	protein	NADH dehydrogenase subunit 4	635aa	11719 A/G polymorphism associated with UC risk in males in 2 independent cohorts	Dankowski et al. 2016 BMC Gastroenterology (PMID 27716073)	somatic mutations in bladder cancer and head and neck cancer and leukemia and liver cancer and breast cancer and esophageal cancer and thyroid cancer and melanoma	Fliss et al., 2000, Science (PMID 10720328); He et al., 2003, Leukemia (PMID14523470); Yin et al., 2010, Mitochondrion (PMID20006738); Parella et al., 2001 Cancer Research (11606403); Zhu et al., 2005 Carcinogenesis (PMID 15375011); Máximo et al., 2002, American Journal of Pathology (PMID 12000737); Mithani et al., 2008, Melanoma Research (PMID 18477896)
	590040	MT-TH	TRNH	MTTH	mitochondrially encoded tRNA histidine	tRNA	tRNA-His	NA
	590085	MT-TS2	TRNS2	MTTS2	mitochondrially encoded tRNA serine 2 (AGU/C)	tRNA	tRNA-Ser	NA	germline mutation observed in a syndrome including insulin dependent diabetes	Lynn et al., 1998 Diabetes (PMID 9792552)
	590055	MT-TL2	TRNL2	MTTL2	mitochondrially encoded tRNA leucine 2 (CUN)	tRNA	tRNA-Leu	NA	germline mutation associated with a subtype of insulin dependent diabetes	Kadowaki et al. 1994 New England Journal Medicine (PMID 8121460)	somatic mutations in melanoma	Mithani et al., 2008, Melanoma Research (PMID 18477896)
	516005	MT-ND5	ND5	MTND5	mitochondrially encoded NADH dehydrogenase 5	protein	NADH dehydrogenase subunit 5	823aa			somatic mutation in bladder cancer and liver cancer and breast cancer and thyroid cancer and melanoma	Fliss et al., 2000, Science (PMID 10720328); Yin et al., 2010, Mitochondrion (PMID20006738); Parella et al., 2001 Cancer Research (11606403); Zhu et al., 2005 Carcinogenesis (PMID 15375011); Máximo et al., 2002, American Journal of Pathology (PMID 12000737); Mithani et al., 2008, Melanoma Research (PMID 18477896)
	516006	MT-ND6	ND6	MTND6	mitochondrially encoded NADH dehydrogenase 6	protein	NADH dehydrogenase subunit 6	240aa			somatic mutations in thyroid cancer and leukemia and melanoma	Yeh et al., 2000, Oncogene (PMID 10803467); He et al., 2003, Leukemia (PMID14523470); Máximo et al., 2002, American Journal of Pathology (PMID 12000737); Mithani et al., 2008, Melanoma Research (PMID 18477896)
	590025	MT-TE	TRNE	MTTE	mitochondrially encoded tRNA glutamic acid	tRNA	tRNA-Glu	NA
	516020	MT-CYB	CYTB	MTCYB	mitochondrially encoded cytochrome b	protein	cytochrome b	512aa			somatic mutations in colorectal cancer and thyroid cancer and bladder cancer and leukemia and proostate cancer and breast cancer and melanoma	Polyak et al., 1998, Nature Genetics (PMID 9806551); Yeh et al., 2000, Oncogene (PMID 10803467); Fliss et al., 2000, Science (PMID 10720328); He et al., 2003, Leukemia (PMID14523470); Petros et al., 2005, PNAS (PMID 15647368); Zhu et al., 2005 Carcinogenesis (PMID 15375011); Máximo et al., 2002, American Journal of Pathology (PMID 12000737); Mithani et al., 2008, Melanoma Research (PMID 18477896)
	590090	MT-TT	TRNT	MTTT	mitochondrially encoded tRNA threonine	tRNA	tRNA-Thr	NA			somatic mutations in melanoma	Mithani et al., 2008, Melanoma Research (PMID 18477896)
	590075	MT-TP	TRNP	MTTP	mitochondrially encoded tRNA proline	tRNA	tRNA-Pro	NA
