# Supplementary material for: Sex Biases in Cancer and Autoimmune Disease Incidence Are Strongly Positively Correlated with Mitochondrial Gene Expression across Human Tissues
Source: Cancers (Basel). 2022 Nov 29;14(23):5885. doi: 10.3390/cancers14235885 (PMC9736300; doi:10.3390/cancers14235885)
Supplement: Supplementary file 1 [file cancers-14-05885-s001.zip › cancers-1948266 Table S7_Cancer_rodent_models.xlsx]

## Sheet: Sheet1
Table S7. Cancer rodent models. Full references are in Supplementary Methods and References.
Strain	Site	GE Allele	Treatment	Phenotype	Sex difference	Effect of sex hormone	Reference
ICR	Colon	N/A	azoxymethane i.p./dextran sulfate sodium in water (AOM-DSS)	inflammation, tumor	M > F	Not tested	Lee et al. 2016
		ERα/β KO			Not tested	Estrogen is protective	Heijmans et al. 2014
C57BL/6	Liver	N/A	diethylnitrosamine (DEN) i.p.	IL6 production, HCC	M > F	Yes	Naugler et al. 2007
SKH-1	Skin	N/A	UV+DMBA -> UV+TPA	SCC	M > F	Not tested	Dehelean et al. 2016
Wistar rat	Kidney	N/A	Ferric nitrilotriacetate (Fe-NTA)	RCC	M > F	Yes	Deguchi et al. 1995
Lewis rat	Pancreas	N/A	Azaserine	Adenoma and carcinoma	M > F	Yes	Longnecker et al. 1990
FVB	Stomach	Ins-Gas	+/- H. Pylori	intramucosal carcinoma	M > F	Not tested	Fox et al. 2003
FVB	Stomach	Ins-Gas	H. Pylori + other bacterial flora	GIN	M > F	Not tested	Lertpiriyapong et al. 2014
C57BL/6	Bladder	N/A	Butyl-(4-hydroxybutyl) nitrosamine in drinking water	Metastatic bladder cancer	M earlier than F	Yes	Bertram et al. 1972
NIH Swiss, Black Swiss, FVB	Lung	N/A	Topical treatment with N-nitrosotris-(2-chloroethyl)urea (NTCU)	Lung SCC	F > M	Not tested	Riolobos et al. 2019
FVB	Lung	Kras (LA2)	Kras(LA2) +/- methyl-nitrosourea (MNU) or urethane	Lung tumor	None	Not tested	Westcott et al. 2015
C57BL/6 + FVB	Skin	Dct::TVA;Braf(CA); Cdkn2a(lox/lox)	s.c. RCAS-Cre	Melanoma	No difference	Not tested	Parkman et al. 2021
1289 Sv	Thyroid	TPO-Cre, Pten(L/L)	N/A	follicular carcinomas	F > M	Not tested	Antico-Arciuch et al. 2010
C57BL/6	Skin	Braf(CA);Tyr-CreERT2;Pten(f/f)	4-OHT at 6-7 weeks	Melanoma	F earlier than M	Not tested	Zhai et al. 2020
