# Supplementary material for: Sex Biases in Cancer and Autoimmune Disease Incidence Are Strongly Positively Correlated with Mitochondrial Gene Expression across Human Tissues
Source: Cancers (Basel). 2022 Nov 29;14(23):5885. doi: 10.3390/cancers14235885 (PMC9736300; doi:10.3390/cancers14235885)
Supplement: Supplementary file 1 [file cancers-14-05885-s001.zip › cancers-1948266 Table S8_AID_rodent_models.xlsx]

## Sheet: Sheet1
Table S8. AID rodent models. Full references are in Supplementary Methods and References.
Strain	Site	GE Allele	Treatment	Phenotype	Sex difference	Effect of sex hormone	Reference
BXSB/Mpj	Kidney	Yaa mutation (lupus-like in male)	Castration	Milder glomerulonephritis	N/A	Castration is protective	Otani et al. 2021
CD1	Pancreas	N/A	multiple low-dose streptozotoccin (SZ) injections	Glucose intolerance	M > F	Yes	Rossini et al. 1978
129	Colon	ERα/β KO	H. Pylori oral gavage	Inflammatory bowel disease	N/A	Estrogen is protective	Cook et al. 2014
C57Bl/6 J	Colon	N/A	2% DSS I drinking water	Inflammatory bowel disease	M > F	Estrogen is protective	Bábíčková et al. 2015
C57Bl/6 J	Skin	N/A	Imiquimod	Psoriasis	M > F	Not tested	Follansbee et al. 2019
BALB/c	Thyroid	N/A	i.m. adenoviral A-subunit of the TSH receptor	Graves' disease	N/A	Testosterone is protective	Zhao et al. 2019
SJL, ASW, NZW	CNS	N/A	immunize w/ myelin antigen; CFA, tuberculosis bacterium, pertussis toxin.	Experimental autoimmune encephalomyelitis (EAE); models MS	F > M	Mixed results with ovariectomy of SJL; mixed results with castration; Exogenous estrogens & androgens protective	Spence & Voskuhl 2012
B10.PL, PL/J					M > F
